# Supplementary material for: Systemic inflammatory response and neuromuscular involvement in amyotrophic lateral sclerosis
Source: PubMed Central journal article supplement (PMC4897985; doi:10.1212/nxi.0000000000000244), 2016-06-01
Supplement: supp_3.4.e244_fig_e1.pdf [file supp_3.4.e244_fig_e1.pdf]

Figure e-1

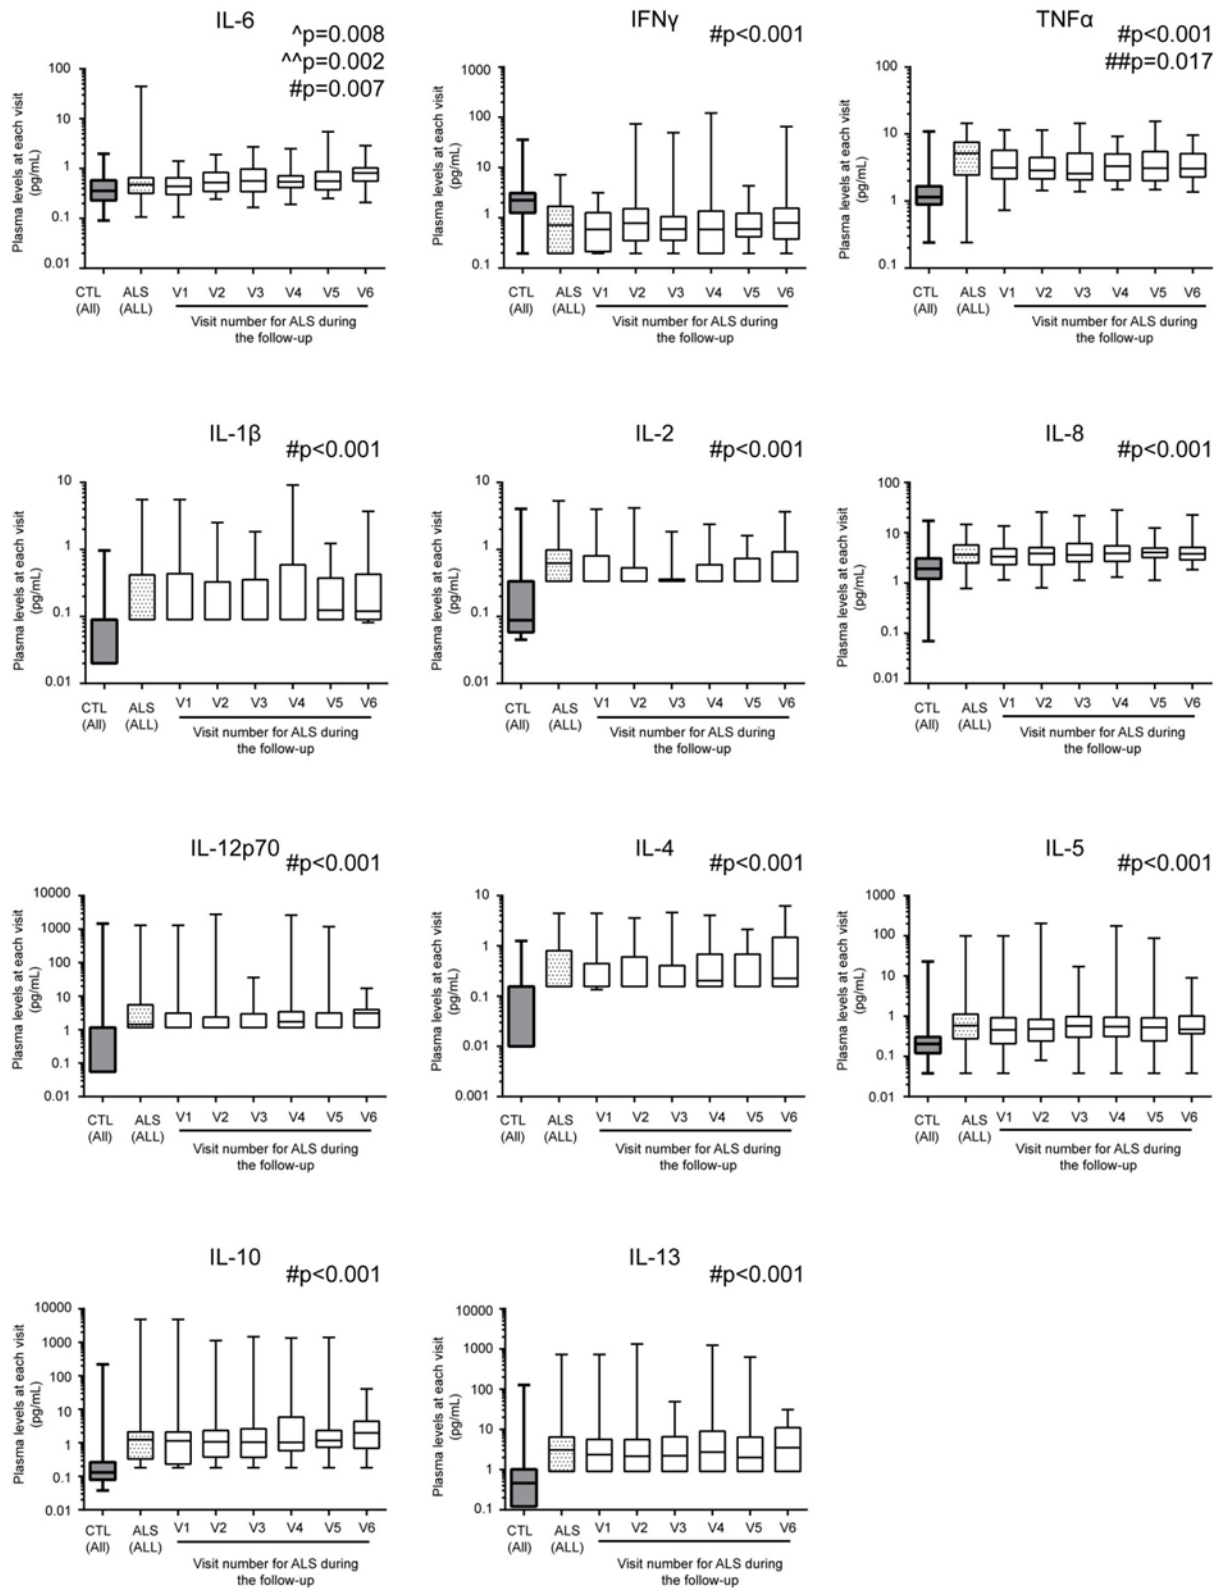

**Figure e-1. Plasma cytokine levels of ALS patients at each visit in the longitudinal and case-control studies.**

The box-and-whisker plots show the expression of the 11 cytokines obtained at baseline (V1) and during the 15-month follow-up period (V2-V6) from 59 ALS cases (clear box) who underwent serial sampling. The boxes represent the Median (IQR) levels at each visit and the whiskers indicate the ranges. Only IL-6 showed a small but significant increase in expression between V1 and V6. Expression data from all the controls (filled box) and the ALS patients (dotted box) are also presented for reference. <sup>^</sup>P-value: Kruskal-Wallis test examining changes of IL-6 expression between visits; <sup>^</sup>p-value adjusted for multiple comparison between V1 and V6; #p-value: Mann-Whitney test examining changes in IL-6 expression between all controls and all ALS; ##p-value: Mann-Whitney test examining changes of TNF $\alpha$  expression between all ALS and the 59 ALS included in the longitudinal cohort; not significant p-values are not reported.
