# Supplementary material for: Systemic inflammatory response and neuromuscular involvement in amyotrophic lateral sclerosis
Source: PubMed Central journal article supplement (PMC4897985; doi:10.1212/nxi.0000000000000244), 2016-06-01
Supplement: supp_3.4.e244_table_e1.pdf [file supp_3.4.e244_table_e1.pdf]

**Table e-1. Summary of cut-off used to determine tertiles in Logistic regression analysis and Cos regression analysis.**

| Table in the main text                                                                                          | Table e-2A   |          | Table e-2B                                    |          | Table e-2C & Table e-2D |          |
|-----------------------------------------------------------------------------------------------------------------|--------------|----------|-----------------------------------------------|----------|-------------------------|----------|
| Defined by                                                                                                      | All subjects |          | Case and Controls<br>without any missing data |          | ALS only                |          |
| Cut-off for 1 <sup>st</sup> and 2 <sup>nd</sup> tertiles (A) & 2 <sup>nd</sup> and 3 <sup>rd</sup> tertiles (B) | <b>A</b>     | <b>B</b> | <b>A</b>                                      | <b>B</b> | <b>A</b>                | <b>B</b> |
| <b>CRP (mg/L)</b>                                                                                               | 2.000        | 5.000    | 2.000                                         | 4.500    | 2.000                   | 6.000    |
| <b>CK (U/L)</b>                                                                                                 | 98.655       | 165.017  | 91.662                                        | 169.000  | 127.988                 | 273.006  |
| <b>Ferritin (µg/L)</b>                                                                                          | 95.000       | 177.339  | 97.324                                        | 159.676  | 118.652                 | 235.670  |
| <b>IL-6 (pg/mL)</b>                                                                                             | 0.321        | 0.538    | 0.317                                         | 0.545    | 0.362                   | 0.569    |
| <b>IFNγ (pg/mL)</b>                                                                                             | 0.915        | 2.175    | 0.843                                         | 2.218    | 0.397                   | 1.304    |
| <b>TNFα (pg/mL)</b>                                                                                             | 1.405        | 5.041    | 1.185                                         | 2.544    | 3.138                   | 6.496    |
| <b>IL-1β (pg/mL)</b>                                                                                            | 0.038        | 0.090    | 0.020                                         | 0.090    | 0.090                   | 0.472    |
| <b>IL-2 (pg/mL)</b>                                                                                             | 0.189        | 0.356    | 0.101                                         | 0.335    | 0.335                   | 0.920    |
| <b>IL-8 (pg/mL)</b>                                                                                             | 2.010        | 3.620    | 1.752                                         | 3.189    | 2.931                   | 4.301    |
| <b>IL-12p70 (pg/mL)</b>                                                                                         | 0.110        | 1.451    | 0.069                                         | 1.150    | 1.150                   | 5.083    |
| <b>IL-4 (pg/mL)</b>                                                                                             | 0.012        | 0.166    | 0.010                                         | 0.155    | 0.155                   | 0.801    |
| <b>IL-5 (pg/mL)</b>                                                                                             | 0.197        | 0.579    | 0.165                                         | 0.406    | 0.373                   | 0.946    |
| <b>IL-10 (pg/mL)</b>                                                                                            | 0.180        | 1.157    | 0.158                                         | 0.745    | 0.638                   | 1.658    |
| <b>IL-13 (pg/mL)</b>                                                                                            | 0.900        | 2.945    | 0.595                                         | 1.253    | 1.039                   | 4.853    |

Cut-off values used for tertile transformation in the logistic regression analysis and Cox regression analysis.
