# Supplementary material for: Systemic inflammatory response and neuromuscular involvement in amyotrophic lateral sclerosis
Source: PubMed Central journal article supplement (PMC4897985; doi:10.1212/nxi.0000000000000244), 2016-06-01
Supplement: supp_3.4.e244_table_e2.pdf [file supp_3.4.e244_table_e2.pdf]

**Table e-2. Summary of logistic regression analysis for each plasma marker.**

| Table e-2A                    | <b><u>ALS vs Controls</u>: OR and relative 95% CI of <i>individual</i> plasma markers, with and without further adjustment for clinical variables.</b> |                |                                       |                |
|-------------------------------|--------------------------------------------------------------------------------------------------------------------------------------------------------|----------------|---------------------------------------|----------------|
|                               | <b>Basic model<sup>a</sup></b>                                                                                                                         |                | <b>Multivariate model<sup>b</sup></b> |                |
| <b>Markers</b>                | <b>OR (95%CI)</b>                                                                                                                                      | <b>p-value</b> | <b>OR (95%CI)</b>                     | <b>p-value</b> |
| <b>CK</b>                     | 2.41 (1.54, 3.78)                                                                                                                                      | <0.001         | 3.03 (1.80, 5.10)                     | <0.001         |
| <b>Ferritin</b>               | 2.10 (1.37, 3.23)                                                                                                                                      | 0.001          | 2.17 (1.35, 3.47)                     | 0.001          |
| <b>CRP</b>                    | 1.26 (0.79, 2.01)                                                                                                                                      | 0.33           | N/A                                   | N/A            |
| <b>IL-6</b>                   | 1.34 (0.89, 2.02)                                                                                                                                      | 0.16           | 1.28 (0.80, 2.04)                     | 0.31           |
| <b>TNF<math>\alpha</math></b> | 8.00 (4.33, 14.76)                                                                                                                                     | <0.001         | 7.24 (3.81, 13.77)                    | <0.001         |
| <b>IL-1<math>\beta</math></b> | 7.41 (4.01, 13.69)                                                                                                                                     | <0.001         | 6.60 (3.51, 12.39)                    | <0.001         |
| <b>IL-8</b>                   | 3.31 (2.08, 5.26)                                                                                                                                      | <0.001         | 3.42 (2.03, 5.74)                     | <0.001         |
| <b>IFN<math>\gamma</math></b> | 0.20 (0.12, 0.34)                                                                                                                                      | <0.001         | 0.21 (0.12, 0.37)                     | <0.001         |
| <b>IL-2</b>                   | 15.49 (7.12, 33.68)                                                                                                                                    | <0.001         | 14.22 (6.32, 32.01)                   | <0.001         |
| <b>IL-12p70</b>               | 12.51 (7.12, 33.68)                                                                                                                                    | <0.001         | 11.41 (5.32, 24.48)                   | <0.001         |
| <b>IL-4</b>                   | 9.74 (5.02, 18.90)                                                                                                                                     | <0.001         | 10.96 (5.19, 23.18)                   | <0.001         |
| <b>IL-5</b>                   | 3.49 (2.17, 5.61)                                                                                                                                      | <0.001         | 3.59 (2.14, 6.03)                     | <0.001         |
| <b>IL-13</b>                  | 11.38 (5.52, 23.46)                                                                                                                                    | <0.001         | 11.05 (5.15, 23.69)                   | <0.001         |
| <b>IL-10</b>                  | 10.67 (5.27, 21.59)                                                                                                                                    | <0.001         | 10.19 (4.84, 21.48)                   | <0.001         |
|                               |                                                                                                                                                        |                |                                       |                |
| Table e-2B                    | <b><u>ALS vs Controls</u> OR and relative 95% CI of <i>mutually-adjusted</i> plasma markers in a basic and a multivariate model.</b>                   |                |                                       |                |

|                        | Basic model <sup>a</sup> |         | Multivariate model <sup>b</sup> |         |
|------------------------|--------------------------|---------|---------------------------------|---------|
| Markers                | OR (95% CI)              | p-value | OR (95% CI)                     | p-value |
| Age at sampling, y     | 1.05 (0.99, 1.12)        | 0.11    | 0.92 (0.80, 1.06)               | 0.26    |
| Gender <sup>c</sup>    | 0.17 (0.03, 0.86)        | 0.03    | 0.29 (0.02, 4.39)               | 0.37    |
| CK                     | 1.36 (0.54, 3.43)        | 0.51    | 0.88 (0.23, 3.33)               | 0.85    |
| Ferritin               | 1.74 (0.70, 4.33)        | 0.23    | 0.61 (0.13, 2.81)               | 0.53    |
| CRP                    | 0.54 (0.14, 2.13)        | 0.38    | 0.34 (0.05, 2.15)               | 0.25    |
| IL-6                   | 5.53 (1.31, 23.30)       | 0.02    | 18.55 (1.37, 251.95)            | 0.03    |
| TNF $\alpha$           | 5.05 (0.93, 27.59)       | 0.06    | 35.78 (1.86, 689.20)            | 0.02    |
| IL-1 $\beta$           | 1.37 (0.24, 7.78)        | 0.72    | 0.79 (0.06, 10.11)              | 0.86    |
| IL-8                   | 0.63 (0.28, 1.73)        | 0.37    | 0.34 (0.07, 1.78)               | 0.20    |
| IFN $\gamma$           | 0.14 (0.04, 0.55)        | 0.005   | 0.09 (0.01, 0.62)               | 0.02    |
| IL-2                   | 1.96 (0.16, 24.74)       | 0.61    | 0.23 (0.01, 8.41)               | 0.43    |
| IL-12p70               | 0.60 (0.04, 10.22)       | 0.72    | 0.06 (0.001, 2.79)              | 0.15    |
| IL-4                   | 2.05 (0.40, 10.52)       | 0.39    | 90.90 (1.25, 6603.62)           | 0.04    |
| IL-5                   | 1.27 (0.33, 4.84)        | 0.73    | 1.64 (0.31, 8.73)               | 0.57    |
| IL-13                  | 4.88 (0.52, 45.99)       | 0.17    | 20.69 (0.65, 656.10)            | 0.086   |
| IL-10                  | 1.001 (0.99, 1.02)       | 0.86    | 1.005 (0.98, 1.03)              | 0.74    |
| Arthritis <sup>d</sup> | N/A                      |         | 190.63 (0.27, 133073.73)        | 0.12    |

|                                         |  |                       |       |
|-----------------------------------------|--|-----------------------|-------|
| <b>Autoimmune pathology<sup>d</sup></b> |  | 7.61 (0.02, 2561.16)  | 0.49  |
| <b>Hypertension<sup>d</sup></b>         |  | 0.03 (0.001, 0.97)    | 0.048 |
| <b>Diabetes<sup>d</sup></b>             |  | 12.18 (0.04, 3510.54) | 0.39  |
| <b>Hyperlipidaemia<sup>d</sup></b>      |  | 8.65 (0.24, 314.33)   | 0.24  |
| <b>Statin Usage<sup>d</sup></b>         |  | 0.24 (0.005, 10.76)   | 0.46  |
| <b>CVD Risk</b>                         |  | 68.82 (1.94, 2444.97) | 0.02  |

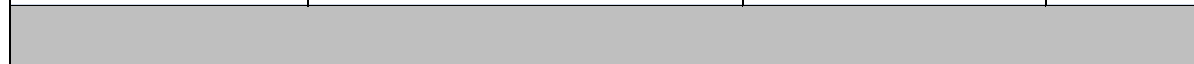

|                               |                                                                                                                                                                              |                |                                       |                |
|-------------------------------|------------------------------------------------------------------------------------------------------------------------------------------------------------------------------|----------------|---------------------------------------|----------------|
| <b>Table e-2C</b>             | <b>HR and relative 95% CI of <i>individual</i> plasma markers with and without further adjustment for clinical variables to evaluate survival <u>among ALS patients.</u></b> |                |                                       |                |
|                               | <b>Basic model<sup>a</sup></b>                                                                                                                                               |                | <b>Multivariate model<sup>b</sup></b> |                |
| <b>Markers</b>                | <b>HR (95% CI)</b>                                                                                                                                                           | <b>p-value</b> | <b>HR (95% CI)</b>                    | <b>p-value</b> |
| <b>CK</b>                     | 0.95 (0.70, 1.29)                                                                                                                                                            | 0.74           | 0.92 (0.67, 1.26)                     | 0.59           |
| <b>Ferritin</b>               | 1.74 (1.26, 2.41)                                                                                                                                                            | 0.001          | 1.71 (1.20, 2.44)                     | 0.003          |
| <b>CRP</b>                    | 1.19 (0.88, 1.61)                                                                                                                                                            | 0.26           | N/A                                   | N/A            |
| <b>IL-6</b>                   | 1.04 (0.77, 1.40)                                                                                                                                                            | 0.82           | 1.02 (0.73, 1.42)                     | 0.92           |
| <b>TNF<math>\alpha</math></b> | 1.26 (0.94, 1.71)                                                                                                                                                            | 0.13           | 1.31 (0.94, 1.81)                     | 0.11           |
| <b>IL-1<math>\beta</math></b> | 0.81 (0.60, 1.11)                                                                                                                                                            | 0.18           | 0.70 (0.48, 1.03)                     | 0.07           |
| <b>IL-8</b>                   | 1.07 (0.80, 1.45)                                                                                                                                                            | 0.65           | 1.18 (0.84, 1.66)                     | 0.35           |
| <b>IFN<math>\gamma</math></b> | 1.05 (0.78, 1.42)                                                                                                                                                            | 0.74           | 1.01 (0.73, 1.39)                     | 0.97           |

|                                    |                                                                                                                                                              |                |                                       |                |
|------------------------------------|--------------------------------------------------------------------------------------------------------------------------------------------------------------|----------------|---------------------------------------|----------------|
| <b>IL-2</b>                        | 1.29 (0.96, 1.74)                                                                                                                                            | 0.09           | 1.43 (1.04, 1.98)                     | 0.03           |
| <b>IL-12p70</b>                    | 1.07 (0.80, 1.42)                                                                                                                                            | 0.66           | 1.09 (0.80, 1.48)                     | 0.60           |
| <b>IL-4</b>                        | 0.94 (0.69, 1.27)                                                                                                                                            | 0.68           | 0.98 (0.68, 1.40)                     | 0.90           |
| <b>IL-5</b>                        | 0.95 (0.72, 1.25)                                                                                                                                            | 0.71           | 0.89 (0.65, 1.22)                     | 0.47           |
| <b>IL-13</b>                       | 1.01 (0.75, 1.36)                                                                                                                                            | 0.96           | 1.00 (0.72, 1.38)                     | 0.99           |
| <b>IL-10</b>                       | 1.06 (0.80, 1.41)                                                                                                                                            | 0.69           | 1.05 (0.77, 1.43)                     | 0.77           |
|                                    |                                                                                                                                                              |                |                                       |                |
| <b>Table e-2D</b>                  | <b>HR and relative 95% CI of <i>mutually-adjusted</i> plasma markers in a basic and a multivariate model to evaluate survival <i>among ALS patients</i>.</b> |                |                                       |                |
|                                    | <b>Basic model<sup>a</sup></b>                                                                                                                               |                | <b>Multivariate model<sup>b</sup></b> |                |
| <b>Markers</b>                     | <b>HR (95% CI)</b>                                                                                                                                           | <b>p-value</b> | <b>HR (95% CI)</b>                    | <b>p-value</b> |
| <b>Age at sampling, y</b>          | 1.05 (1.02, 1.08)                                                                                                                                            | 0.002          | 1.03 (0.97, 1.08)                     | 0.37           |
| <b>Gender<sup>c</sup></b>          | 1.77 (1.01, 3.12)                                                                                                                                            | 0.047          | 2.42 (1.12, 4.88)                     | 0.02           |
| <b>Ferritin</b>                    | 1.46 (1.04, 2.04)                                                                                                                                            | 0.03           | 1.38 (0.95, 1.99)                     | 0.09           |
| <b>IL2</b>                         | 1.61 (1.05, 2.47)                                                                                                                                            | 0.03           | 1.77 (1.10, 2.84)                     | 0.02           |
| <b>IL1<math>\beta</math></b>       | 0.55 (0.35, 0.85)                                                                                                                                            | 0.01           | 0.52 (0.32, 0.85)                     | 0.009          |
| <b>TNF<math>\alpha</math></b>      | 1.18 (0.77, 1.81)                                                                                                                                            | 0.45           | 1.20 (0.77, 1.87)                     | 0.42           |
| <b>Hypertension<sup>d</sup></b>    | N/A                                                                                                                                                          |                | 1.47 (0.80, 2.70)                     | 0.21           |
| <b>Diabetes<sup>d</sup></b>        |                                                                                                                                                              |                | 0.09 (0.02, 0.49)                     | 0.005          |
| <b>Hyperlipidaemia<sup>d</sup></b> |                                                                                                                                                              |                | 1.89 (0.64, 5.55)                     | 0.25           |
| <b>Statin usage<sup>d</sup></b>    |                                                                                                                                                              |                | 1.83 (0.76, 4.43)                     | 0.18           |

|                                         |  |                   |      |
|-----------------------------------------|--|-------------------|------|
| <b>CVD risk</b>                         |  | 1.27 (0.61, 2.66) | 0.52 |
| <b>CRP</b>                              |  | 1.13 (0.79, 1.60) | 0.51 |
| <b>Arthritis<sup>d</sup></b>            |  | 0.40 (0.13, 1.22) | 0.11 |
| <b>Autoimmune pathology<sup>d</sup></b> |  | 2.13 (0.76, 6.03) | 0.15 |

**Abbreviations:** OR, odds ratios; CI, confidence intervals; HR, hazard ratios; N/A, not applicable. <sup>a</sup>, Basic model: adjusted for gender and age at sampling; <sup>b</sup>, Multivariate model: adjusted for gender, age at sampling, CRP, hypertension, diabetes, hyperlipidaemia, statin usage, CVD risk, arthritis and autoimmune pathology; <sup>c</sup>, reference group: male; <sup>d</sup>, reference group: without the disease/treatment.
